# Supplementary material for: A ligand-incorporating strategy towards single-component white light in ionic zero-dimensional indium chlorides
Source: Royal Society of Chemistry journal article supplement (doi:10.1039/d3tc04659a), 2024-01-01
Supplement: d3tc04659a1.pdf [file d3tc04659a1.pdf]

*Supporting Information for*

## **A Ligand-Incorporating Strategy towards Single-Component White Light in Ionic Zero-Dimensional Indium Chlorides**

Hao-Wei Lin,<sup>a,b</sup> Abdusalam Ablez,<sup>a,b</sup> Zhong-Hua Deng,<sup>a</sup> Zhi-Hua Chen,<sup>a,c</sup> Ying-Chen Peng,<sup>a,c</sup> Ze-Ping Wang,<sup>a\*</sup> Ke-Zhao Du<sup>d\*</sup> and Xiao-Ying Huang<sup>a,c\*</sup>

Affiliations:

<sup>a</sup>State Key Laboratory of Structural Chemistry, Fujian Institute of Research on the Structure of Matter, Chinese Academy of Sciences, Fuzhou, Fujian 350002, P. R. China.

<sup>b</sup>College of Chemistry, Fuzhou University, Fuzhou 350108, P. R. China

<sup>c</sup>University of Chinese Academy of Sciences, Beijing 100049, P. R. China.

<sup>d</sup>Fujian Provincial Key Laboratory of Advanced Materials Oriented Chemical Engineering, Fujian Normal University, 32 Shangsan Road, Fuzhou 350007, P. R. China.

## Experimental section

### Materials

All purchased reagents were utilized directly without further purification. The detailed information for the reagents is listed as follows: 1-Allyl-2,3-dimethylimidazolium chloride ([Ammim]Cl, 98%, Lanzhou Greenchem ILs, Lanzhou, China); 4,4'-dimethyl-2,2'-bipyridyl (dmbp, 98%, Adamas); indium (III) chloride tetrahydrate ( $\text{InCl}_3 \cdot 4\text{H}_2\text{O}$ , 99.99%, 9dingchem); acetonitrile ( $\text{CH}_3\text{CN}$ , AR, Sinopharm Chemical Reagent Co., Ltd., Shanghai, China).

### Synthesis

**Synthetic methods:** [Ammim][ $\text{InCl}_4(\text{dmbp})$ ] were synthesized by the solvothermal process. Firstly, the mixture of  $\text{InCl}_3 \cdot 4\text{H}_2\text{O}$  (1 mmol, 0.294 g), dmbp (1 mmol, 0.185 g), [Ammim]Cl (1 mmol, 0.173 g), and  $\text{CH}_3\text{CN}$  (5 mL) was added into a 28 mL Teflon-lined steel autoclave. Then, the Teflon-lined steel autoclave was put into the oven for heating. Then, the reactor was heated at 140 °C for 4 days and cooled slowly to ambient temperature in 2 days. After allowing it to naturally cool to room temperature (RT), yellowish block crystals were obtained. The yield was calculated to be nearly 85.8% based on In atom. EA: Calcd (%): C, 41.55; H, 4.35; N, 9.69. Found (%): C, 41.57; H, 4.50; N, 9.67.

### Characterization methods

**Single Crystal X-ray diffraction (SCXRD):** A suitable crystal was selected under an optical microscope for the measurement of SCXRD. Intensity data were measured and collected on a Rigaku HyPix-6000HE diffractometer equipped with graphite-monochromated  $\text{GaK}_\alpha$  radiation ( $\lambda = 1.34140 \text{ \AA}$ ) at 298 K. The structure was solved by direct methods and refined by full-matrix least-squares on  $F^2$  using the SHELX-2018 program package.<sup>1</sup> All non-H atoms were refined anisotropically, and the H atoms attached to C atoms were located at geometrically calculated positions. The empirical formula was verified by elemental analysis.

**Powder X-ray diffraction (PXRD):** The experimental PXRD patterns were measured by Rigaku Miniflex-II diffractometer by utilizing  $\text{CuK}_\alpha$  radiation ( $\lambda = 1.54178 \text{ \AA}$ ) in the angular range of  $2\theta =$

5 - 50°. The simulated PXRD pattern was calculated by using the single crystal X-ray structural data at RT *via* Mercury software.

**Thermogravimetric analyses (TGA):** TG curve was recorded on a NETZSCH STA 449F3 instrument with a heating rate of 10 K·min<sup>-1</sup> under the N<sub>2</sub> atmosphere.

**UV-visible absorption spectroscopy (UV-vis):** Steady-state UV-vis was recorded on a Shimadzu 2600 UV/vis spectrometer at room temperature (RT) in the range of 800-200 nm. The BaSO<sub>4</sub> plate was utilized as a standard which possesses 100% reflectance. The absorption data was then obtained from the reflectance spectra by using the Kubelka-Munk function  $\alpha/S = (1 - R)^2/2R$ , where  $\alpha$  refers to the absorption coefficient,  $S$  refers to the scattering coefficient, and  $R$  refers to the reflectance.<sup>2</sup>

**Photoluminescence Characterization:** Photoluminescence excitation (PLE), photoluminescence emission (PL) spectra, PL decay spectra and photoluminescent quantum yields (PLQY) were measured on FLS1000 UV/V/NIR fluorescence spectrometer. Temperature-dependent PL spectra were measured on an FLS980 UV/V/NIR fluorescence spectrometer with temperatures ranging from 77 K to 300 K.

**WLED Performance:** The device WLED was fabricated by coating the mixture of [Ammim][InCl<sub>4</sub>(dmbp)] and silicone on the commercial 380 nm InGaN chip (San'an Optoelectronics CO., LTD.). The photoelectric properties of the WLEDs were measured by HAAS-2000 integrating sphere spectroradiometer system (Everfine, China).

**Density Functional Theory (DFT) Calculations:** According to the single-crystal structure refinement results, DFT calculations of [Ammim][InCl<sub>4</sub>(dmbp)] were implemented in the Vienna ab initio simulation package (VASP).<sup>3, 4</sup> The generalized gradient approximation (GGA) for the exchange-correlation term with the Perdew-Burke-Ernzerhof (PBE) exchange-correlation functional was applied for electron-electron exchange correlation processes.<sup>5</sup> Projected augmented wave (PAW) potentials were used with the valence states 2s and 2p for C and N, 5s and 5p for In, 3s and 3p for Cl. To ensure sufficient accuracy, the cut-off energy of 500 eV for the plane wave expansion was chosen, self-consistent field (SCF) computations were set to a convergence criterion of  $1 \times 10^{-5}$  eV and the force criterion was 0.02 eV Å<sup>-1</sup>.

## Crystallographic data

**Table S1.** Crystal data and structure refinement for [Ammim][InCl<sub>4</sub>(dmbp)] .

|                                                      |                                                                                               |
|------------------------------------------------------|-----------------------------------------------------------------------------------------------|
| CCDC number                                          | 2311862                                                                                       |
| Empirical formula                                    | C <sub>20</sub> H <sub>25</sub> Cl <sub>4</sub> InN <sub>4</sub>                              |
| Formula weight                                       | 578.06                                                                                        |
| Temperature/K                                        | 298(2)                                                                                        |
| Wavelength/Å                                         | 1.34140                                                                                       |
| Crystal system                                       | Monoclinic                                                                                    |
| Space group                                          | <i>P</i> 2 <sub>1</sub> / <i>c</i>                                                            |
| <i>a</i> /Å                                          | 12.3933(2)                                                                                    |
| <i>b</i> /Å                                          | 13.3229(2)                                                                                    |
| <i>c</i> /Å                                          | 15.3602(2)                                                                                    |
| <i>α</i> /°                                          | 90                                                                                            |
| <i>β</i> /°                                          | 109.006(2)                                                                                    |
| <i>γ</i> /°                                          | 90                                                                                            |
| Volume/Å <sup>3</sup>                                | 2397.93(7)                                                                                    |
| <i>Z</i>                                             | 4                                                                                             |
| $\rho_{\text{calc}}$ g/cm <sup>3</sup>               | 1.601                                                                                         |
| Absorption coefficient/mm <sup>-1</sup>              | 8.174                                                                                         |
| <i>F</i> (000)                                       | 1160                                                                                          |
| Crystal size/mm <sup>3</sup>                         | 0.200×0.100×0.020                                                                             |
| Theta range for data collection /°                   | 3.279 - 60.046                                                                                |
| Reflections collected/ unique                        | 17775/5305 [ <i>R</i> <sub>int</sub> = 0.0346]                                                |
| Refinement method                                    | Full-matrix least-squares on <i>F</i> <sup>2</sup>                                            |
| Data/restraints/parameters                           | 5305/0/267                                                                                    |
| Goodness-of-fit on <i>F</i> <sup>2</sup>             | 1.062                                                                                         |
| Final <i>R</i> indexes [ <i>I</i> >= 2σ( <i>I</i> )] | <i>R</i> <sub>1</sub> <sup>[a]</sup> = 0.0279, <i>wR</i> <sub>2</sub> <sup>[b]</sup> = 0.0722 |
| Final <i>R</i> indexes [all data]                    | <i>R</i> <sub>1</sub> <sup>[a]</sup> = 0.0311, <i>wR</i> <sub>2</sub> <sup>[b]</sup> = 0.0740 |
| Largest diff. peak and hole                          | 0.743/-0.929                                                                                  |

[a]  $R_1 = \sum \|F_o\| - \|F_c\| / \sum \|F_o\|$ , [b]  $wR_2 = [\sum w(F_o^2 - F_c^2)^2 / \sum w(F_o^2)]^{1/2}$

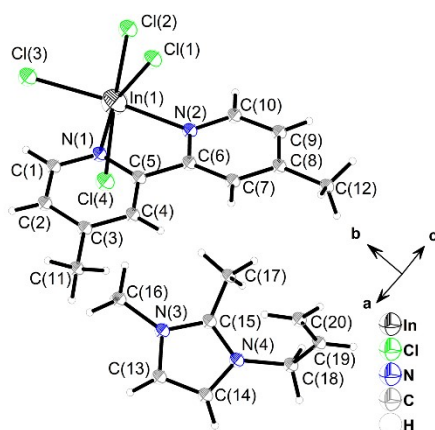

**Figure S1.** ORTEP drawing (50% ellipsoid probability) of the asymmetric units of [Ammim][InCl<sub>4</sub>(dmbp)].

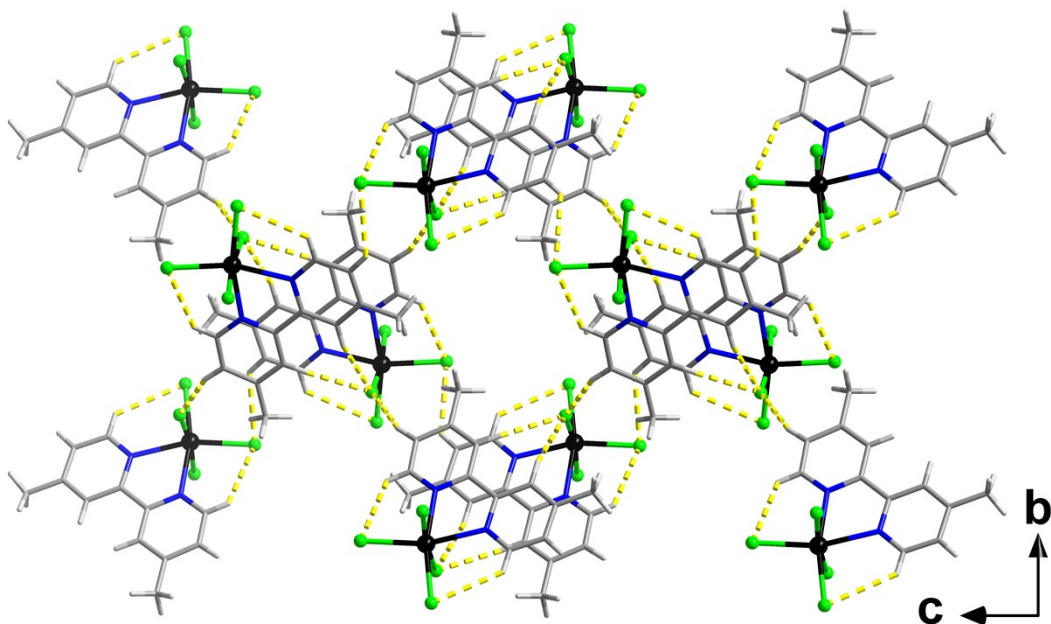

**Figure S2.** The diagram of anionic units connected by hydrogen bonds (yellow dotted line) viewed along the *a* axis.

**Table S2.** Selected bond lengths (Å) and bond angles (°) for [Ammim][InCl<sub>4</sub>(dmbp)].

|                  |            |                   |           |
|------------------|------------|-------------------|-----------|
| In(1)-N(2)       | 2.3026(19) | In(1)-Cl(1)       | 2.4573(6) |
| In(1)-N(1)       | 2.3078(17) | In(1)-Cl(4)       | 2.5079(7) |
| In(1)-Cl(3)      | 2.4349(6)  | In(1)-Cl(2)       | 2.5095(6) |
| N(2)-In(1)-N(1)  | 71.24(6)   | Cl(1)-In(1)-Cl(4) | 91.19(2)  |
| N(2)-In(1)-Cl(3) | 166.23(5)  | N(1)-In(1)-Cl(1)  | 163.91(5) |
| N(1)-In(1)-Cl(3) | 95.85(5)   | N(2)-In(1)-Cl(4)  | 89.27(5)  |
| N(2)-In(1)-Cl(1) | 93.79(5)   | N(1)-In(1)-Cl(4)  | 82.96(5)  |

Symmetry transformations used to generate equivalent atoms: N.A.

**Table S3.** Hydrogen bonds for [Ammim][InCl<sub>4</sub>(dmbp)].

| D-H...A                | <i>d</i> (D-H) | <i>d</i> (H...A) | <i>d</i> (D...A) | ∠(DHA) |
|------------------------|----------------|------------------|------------------|--------|
| C(1)-H(1A)...Cl(3)     | 0.93           | 2.90             | 3.542(3)         | 127.1  |
| C(2)-H(2A)...Cl(1)#1   | 0.93           | 2.84             | 3.514(3)         | 130.2  |
| C(4)-H(4A)...Cl(2)#2   | 0.93           | 2.93             | 3.785(3)         | 152.8  |
| C(7)-H(7A)...Cl(2)#2   | 0.93           | 2.71             | 3.592(2)         | 159.6  |
| C(9)-H(9A)...Cl(2)#3   | 0.93           | 2.82             | 3.662(3)         | 150.5  |
| C(10)-H(10A)...Cl(1)   | 0.93           | 2.86             | 3.496(3)         | 126.9  |
| C(13)-H(13A)...Cl(3)#4 | 0.93           | 2.84             | 3.541(3)         | 132.7  |
| C(14)-H(14A)...Cl(1)#5 | 0.93           | 2.85             | 3.632(3)         | 142.5  |
| C(17)-H(17B)...Cl(4)#6 | 0.96           | 2.77             | 3.691(3)         | 160.7  |
| C(18)-H(18A)...Cl(4)#6 | 0.97           | 2.95             | 3.839(3)         | 152.1  |
| C(18)-H(18B)...Cl(1)#5 | 0.97           | 2.93             | 3.655(3)         | 132.3  |

Symmetry transformations used to generate equivalent atoms: #1 *x*, -*y*+3/2, *z*-1/2 #2 -*x*, -*y*+1, -*z*+1 #3 -*x*-1, *y*-1/2, -*z*+3/2 #4 -*x*+1, -*y*+1, -*z*+1 #5 *x*, -*y*+1/2, *z*-1/2 #6 -*x*+1, *y*-1/2, -*z*+3/2

**Table S4.** Selected  $\pi \cdots \pi$  interactions data for [Ammim][InCl<sub>4</sub>(dmbp)].

| Cg(I) $\cdots$ Cg(J)      | ARU(J)    | Cg $\cdots$ Cg(Å) | $\alpha$ (°) | $\beta$ (°) | $\gamma$ (°) |
|---------------------------|-----------|-------------------|--------------|-------------|--------------|
| Cg(2) $\rightarrow$ Cg(3) | [3566.01] | 3.7883(15)        | 6.52(12)     | 19.1        | 25.0         |
| Cg(3) $\rightarrow$ Cg(2) | [3566.01] | 3.7885(15)        | 6.52(12)     | 25.0        | 19.1         |

[3566] = -x, 1-y, 1-z; Cg(2): N(1)  $\rightarrow$  C(1)  $\rightarrow$  C(2)  $\rightarrow$  C(3)  $\rightarrow$  C(4)  $\rightarrow$  C(5); Cg(3): N(2)  $\rightarrow$  C(6)  $\rightarrow$  C(7)  $\rightarrow$  C(8)  $\rightarrow$  C(9)  $\rightarrow$  C(10)

**Table S5.** Selected C-H $\cdots$  $\pi$  interactions data for [Ammim][InCl<sub>4</sub>(dmbp)].

| C-H(I) $\rightarrow$ Cg(J)       | ARU(J)    | H $\cdots$ Cg(Å) | $\angle$ X $\cdots$ Cg (°) | X $\cdots$ Cg(Å) | X-H, Pi |
|----------------------------------|-----------|------------------|----------------------------|------------------|---------|
| C(20)-H(20A) $\rightarrow$ Cg(4) | [1555.02] | 2.95             | 123                        | 3.545(4)         | 1       |

[1555] = x, y, z; Cg(4): N(3)  $\rightarrow$  C(13)  $\rightarrow$  C(14)  $\rightarrow$  N(4)  $\rightarrow$  C(15)

**Table S6.** Selected anion $\cdots$  $\pi$  interactions data for [Ammim][InCl<sub>4</sub>(dmbp)].

| Y-X(I) $\rightarrow$ Cg(J)      | ARU(J)    | X $\cdots$ Cg(Å) | Y-X $\cdots$ Cg (°) | Y $\cdots$ Cg(Å) | Y-X, Pi |
|---------------------------------|-----------|------------------|---------------------|------------------|---------|
| In(1)-Cl(1) $\rightarrow$ Cg(4) | [2656.02] | 3.4933(15)       | 122.63(4)           | 5.2440(13)       | 24.84   |

[2656] = 1-x, 1/2+y, 3/2-z; Cg(4): N(3)  $\rightarrow$  C(13)  $\rightarrow$  C(14)  $\rightarrow$  N(4)  $\rightarrow$  C(15)

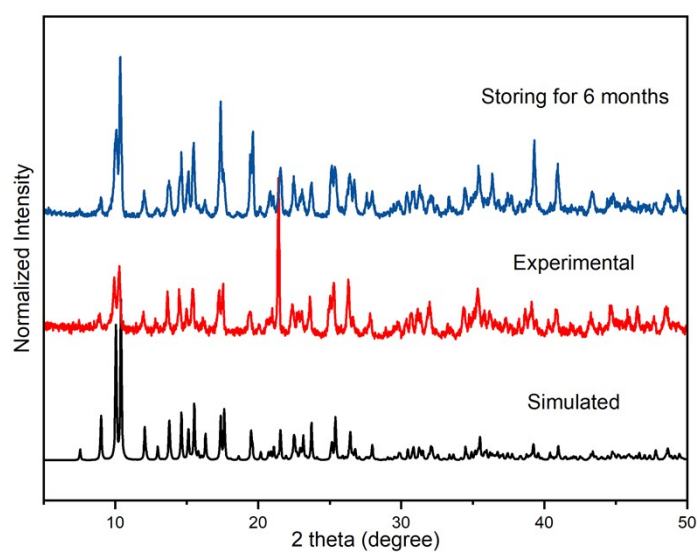**Figure S3.** The experimental PXRD patterns for as-made [Ammim][InCl<sub>4</sub>(dmbp)] and that storing at ambient conditions for six months compared with the one simulated from SCXRD data.

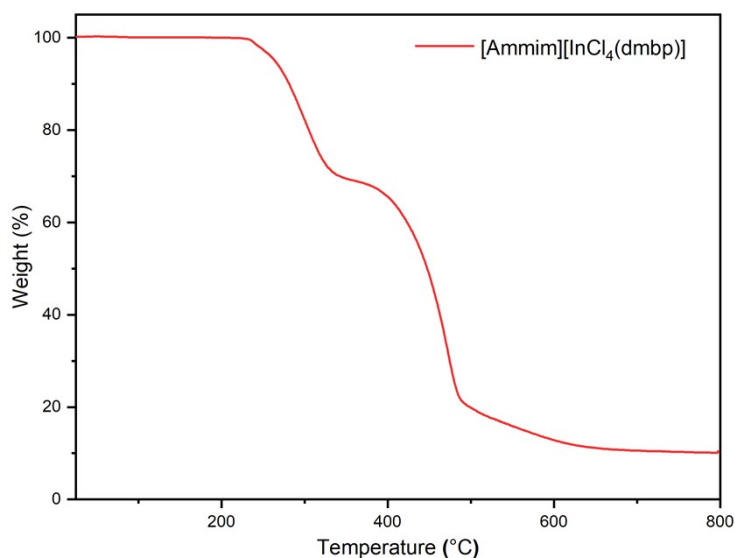

**Figure S4.** The TG curve for [Ammim][InCl<sub>4</sub>(dmbp)].

**Table S7.** Properties of some single-component white light-emitting materials in recent years.

| Compound                                                                                               | PLQY (%) | CIE (x,y)      | CRI  | CCT (K) | Ref.      |
|--------------------------------------------------------------------------------------------------------|----------|----------------|------|---------|-----------|
| [Ammim][InCl <sub>4</sub> (dmbp)]                                                                      | 16.70    | 0.3269, 0.3461 | 93.2 | 5744    | This work |
| InCl <sub>3</sub> -TPOBD                                                                               | 10.50    | 0.28, 0.33     | 84.8 | 9370    | 6         |
| (H <sub>2</sub> AMP)CdBr <sub>4</sub> ·H <sub>2</sub> O                                                | 23.46    | 0.36, 0.38     | 98.0 | --      | 7         |
| (EDBE)PbBr <sub>4</sub>                                                                                | 2.16     | 0.39, 0.42     | 84.0 | 3990    | 8         |
| (PEPC)PbCl <sub>4</sub>                                                                                | 2.10     | 0.37, 0.42     | 84.0 | 4426    | 9         |
| BIF-142-Cl                                                                                             | 16.00    | 0.312, 0.335   | 90.4 | 5364    | 10        |
| DPCu <sub>4</sub> I <sub>6</sub>                                                                       | 89.76    | 0.36, 0.35     | 85.1 | 4415    | 11        |
| (C <sub>12</sub> H <sub>24</sub> O <sub>6</sub> )CsCu <sub>2</sub> Br <sub>3</sub>                     | 78.30    | 0.3397, 0.4280 | 73.7 | 4962    | 12        |
| (TMPA) <sub>2</sub> SnCl <sub>6</sub>                                                                  | 3.88     | 0.31, 0.35     | 86.7 | 5390    | 13        |
| (3APr)PbCl <sub>4</sub>                                                                                | --       | 0.47, 0.45     | 85   | 2835    | 14        |
| (3APr)PbBr <sub>4</sub>                                                                                | --       | 0.43, 0.45     | 83   | 3456    | 14        |
| (3APr)PbI <sub>4</sub>                                                                                 | --       | 0.40, 0.47     | 77   | 4122    | 14        |
| γ-MPAPB                                                                                                | 6.85     | 0.22, 0.23     | 85   | 53281   | 15        |
| PhPz-In                                                                                                | 18.56    | 0.34, 0.34     | 89   | 5244    | 16        |
| AMPd-In                                                                                                | 18.21    | 0.31, 0.33     | 85   | 4770    | 16        |
| AEPz-In                                                                                                | 7.01     | 0.29, 0.35     | 84   | 8149    | 16        |
| (C <sub>12</sub> H <sub>18</sub> N <sub>6</sub> )Pb <sub>2</sub> Cl <sub>10</sub> ·H <sub>2</sub> O    | 1.00     | 0.31, 0.33     | 93.4 | 6512    | 17        |
| [C <sub>4</sub> N <sub>2</sub> H <sub>12</sub> ] <sub>3</sub> [PbBr <sub>5</sub> ] <sub>2</sub> ·4DMSO | 59.00    | 0.3554, 0.4227 | 78   | 4897    | 18        |
| ATZ2                                                                                                   | 4.80     | 0.28, 0.34     | 73   | 8401    | 19        |
| TPMI-Br                                                                                                | 28.3     | 0.32, 0.36     | 85.5 | 6004    | 20        |
| TIM                                                                                                    | 11.8     | 0.33, 0.35     | 85   | 5669    | 21        |
| 1                                                                                                      | 2        | 0.31, 0.35     | 83   | 6218    | 22        |

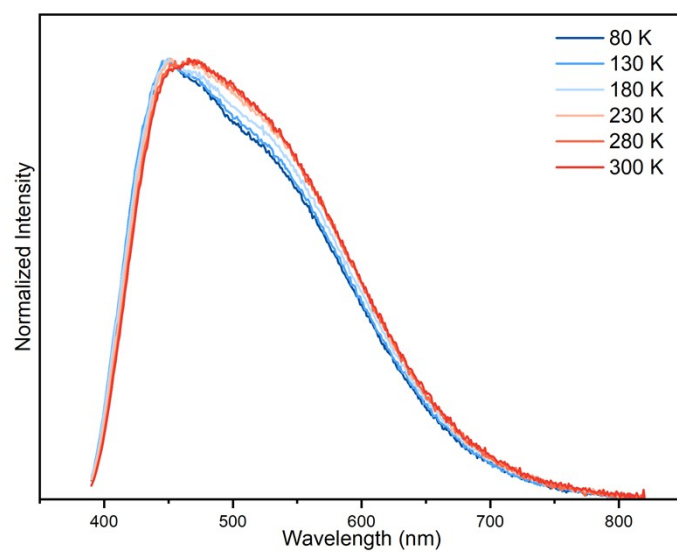

**Figure S5.** Temperature-dependent PL spectra of [Ammim][InCl<sub>4</sub>(dmbp)] under 375 nm excitation.

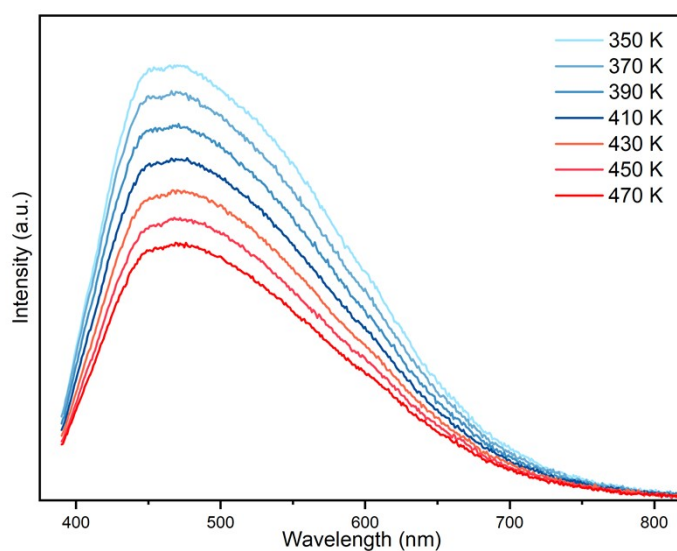

**Figure S6.** Temperature-dependent PL spectra of [Ammim][InCl<sub>4</sub>(dmbp)] under 375 nm excitation at 350 K to 470 K.



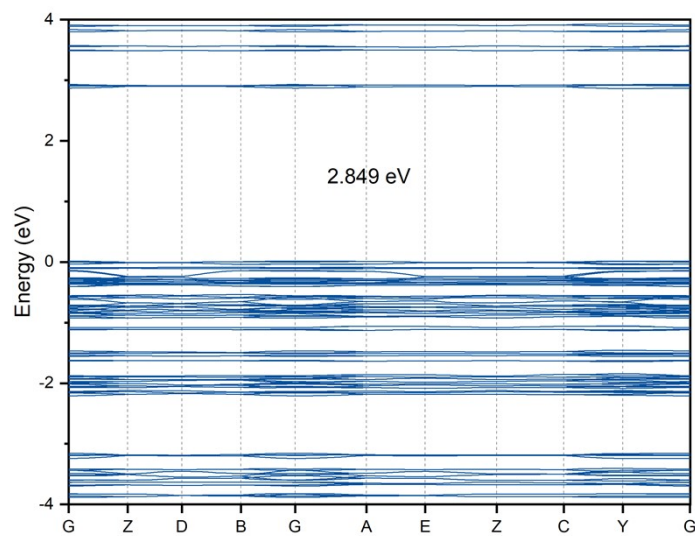

**Figure S7.** The electronic band structure of [Ammim][InCl<sub>4</sub>(dmbp)]. The calculated bandgap of [Ammim][InCl<sub>4</sub>(dmbp)] is 2.849 eV.

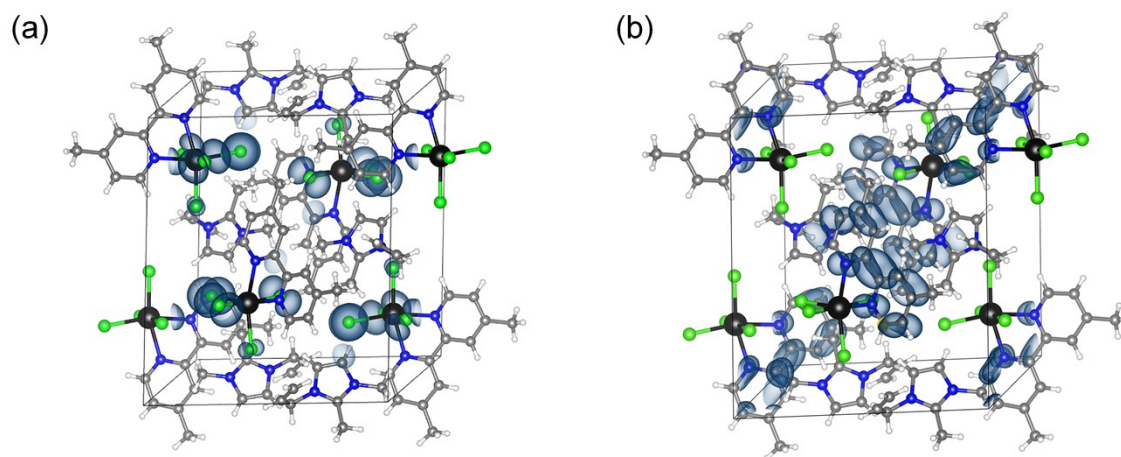

**Figure S8.** The calculated orbital-resolved DOSs of [Ammim][InCl<sub>4</sub>(dmbp)]. The highest occupied molecular orbital (HOMO, a) and lowest occupied molecular orbital (LUMO, b).

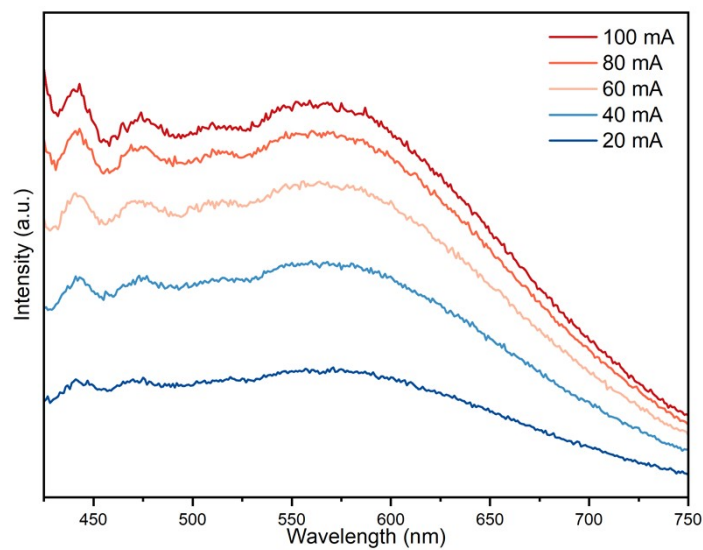

**Figure S9.** The emission spectra of WLED fabricated with [Amim][InCl<sub>4</sub>(dmbp)] coating on InGaN UV chip ( $\lambda_{em} = 380$  nm) from 20 to 100 mA.

**Table S8.** Photoelectric parameters of the fabricated WLED under various currents.

| Current (mA) | CCT  | CRI  | CIE            | LE (lm/W) |
|--------------|------|------|----------------|-----------|
| 20           | 5336 | 93.7 | 0.3369, 0.3601 | 0.98      |
| 40           | 5444 | 93.7 | 0.3340, 0.3570 | 0.85      |
| 60           | 5558 | 93.8 | 0.3311, 0.3534 | 0.73      |
| 80           | 5646 | 93.8 | 0.3290, 0.3500 | 0.62      |
| 100          | 5744 | 93.2 | 0.3269, 0.3461 | 0.52      |

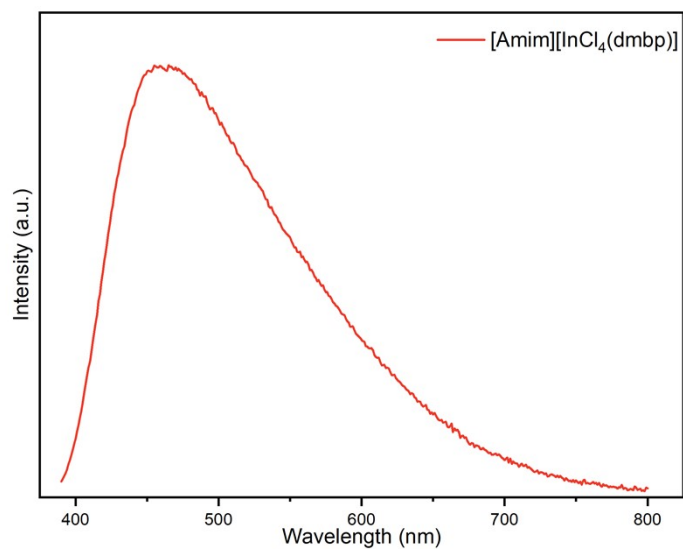

**Figure S10.** The emission spectrum of [Amim][InCl<sub>4</sub>(dmbp)] at 375 nm excitation.

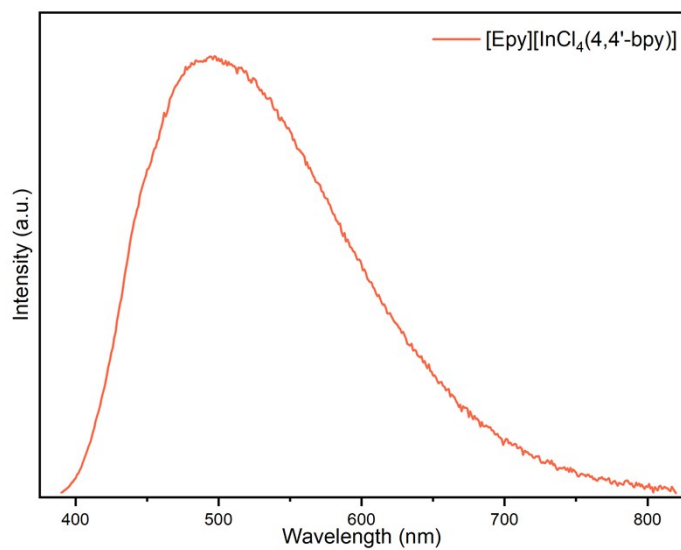

**Figure S11.** The emission spectrum of [Epy][InCl<sub>4</sub>(4,4'-bpy)] at 375 nm excitation.

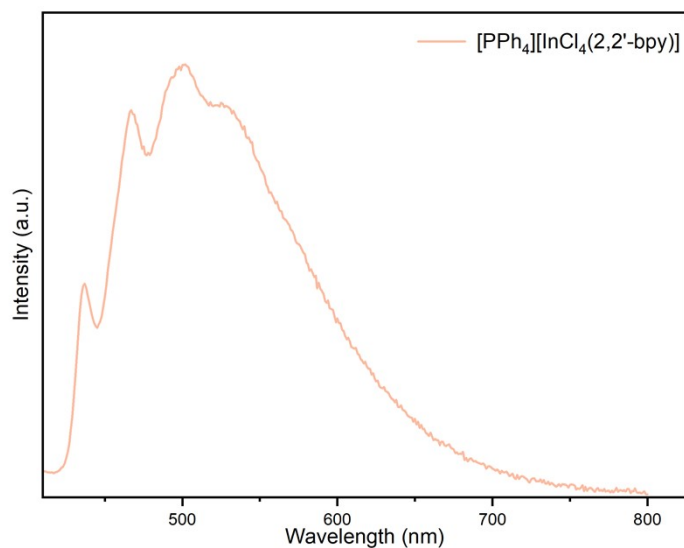

**Figure S12.** The emission spectrum of [PPh<sub>4</sub>][InCl<sub>4</sub>(2,2'-bpy)] at 328 nm excitation.

## References:

1. G. M. Sheldrick, *Acta Crystallogr. Sect. C-Struct. Chem.*, 2015, **71**, 3-8.
2. W. M. Wendlandt and H. G. Hecht, *New York*, 1966.
3. G. Kresse and J. Hafner, *Phys. Rev. B*, 1993, **48**, 13115-13118.
4. G. Kresse and J. Furthmuller, *Phys. Rev. B*, 1996, **54**, 11169-11186.
5. J. P. Perdew, K. Burke and M. Ernzerhof, *Phys. Rev. Lett.*, 1996, **77**, 3865-3868.
6. T. Chen, Y.-J. Ma and D. Yan, *Adv. Funct. Mater.*, 2023, **33**, 2214962.
7. H. Gao, Z. Lu, X. Zhao, K. Zhang, X. Zhu, R. Cheng, S.-L. Li, Z. Qi and X.-M. Zhang, *J. Mater. Chem. C*, 2023, **11**, 9023-9029.

8. E. R. Dohner, A. Jaffe, L. R. Bradshaw and H. I. Karunadasa, *J. Am. Chem. Soc.*, 2014, **136**, 13154-13157.
9. K. Thirumal, W. K. Chong, W. Xie, R. Ganguly, S. K. Muduli, M. Sherburne, M. Asta, S. Mhaisalkar, T. C. Sum, H. S. Soo and N. Mathews, *Chem. Mater.*, 2017, **29**, 3947-3953.
10. Z.-R. Wang, J.-Q. Chen, Q.-H. Li, H.-X. Zhang and J. Zhang, *Adv. Opt. Mater.*, 2023, **11**, 2202743.
11. S. Zhou, Y. Chen, K. Li, X. Liu, T. Zhang, W. Shen, M. Li, L. Zhou and R. He, *Chem. Sci.*, 2023, **14**, 5415-5424.
12. J. Huang, Y. Peng, J. Jin, M. S. Molokeev, X. Yang and Z. Xia, *J. Phys. Chem. Lett.*, 2021, **12**, 12345-12351.
13. Q.-F. Luo, H.-F. Ni, P.-Z. Huang, M. Zhu, C.-F. Wang, Q.-H. Zhuo, D.-W. Fu, Y. Zhang and Z.-X. Zhang, *Mater. Chem. Front.*, 2023, **7**, 6247-6253.
14. X. Li, P. Guo, M. Kepenekian, I. Hadar, C. Katan, J. Even, C. C. Stoumpos, R. D. Schaller and M. G. Kanatzidis, *Chem. Mater.*, 2019, **31**, 3582-3590.
15. Y. Li, C. Ji, L. Li, S. Wang, S. Han, Y. Peng, S. Zhang and J. Luo, *Inorg. Chem. Front.*, 2021, **8**, 2119-2124.
16. D.-Y. Li, Y.-M. Sun, X.-Y. Wang, N.-N. Wang, X.-Y. Zhang, C.-Y. Yue and X.-W. Lei, *J. Phys. Chem. Lett.*, 2022, **13**, 6535-6643.
17. D. Li, W. Wu, S. Wang, X. Zhang, L. Li, Y. Yao, Y. Peng and J. Luo, *J. Mater. Chem. C*, 2020, **8**, 6710-6714.
18. G. Yu, F. Lin, K. Zhou, S. Fang, Y. Shi, W. Liu, H. Hu, B. Ma and H. Lin, *Chem. Mater.*, 2021, **33**, 5668-5674.
19. Y. Song, L. Hu, Q. Cheng, Z. Chen, H. Su, H. Liu, R. Liu, S. Zhu and H. Zhu, *J. Mater. Chem. C*, 2022, **10**, 6392-6401.
20. J. Zhang, P. Alam, S. Zhang, H. Shen, L. Hu, H. H. Y. Sung, I. D. Williams, J. Sun, J. W. Y. Lam, H. Zhang and B. Z. Tang, *Nat. Commun.*, 2022, **13**, 3492.
21. X. Zheng, Y. Huang, D. Xiao, S. Yang, Z. Lin and Q. Ling, *Mater. Chem. Front.*, 2021, **5**, 6960-6968.
22. N.-N. Zhang, C. Sun, X.-M. Jiang, X.-S. Xing, Y. Yan, L.-Z. Cai, M.-S. Wang and G.-C. Guo, *Chem. Commun.*, 2017, **53**, 9269-9272.
